# Supplementary material
Source: MDPI journal article supplement (https://www.mdpi.com/search?q=catalysts-10-00266)
Supplement: s001 [file catalysts-10-00266-s001.pdf]

## Supporting Information

# Selective Oxidation of Benzyl Alcohol by Ag/Pd/m-BiVO<sub>4</sub> Microspheres under Visible Light Irradiation

Xiujuan Yu<sup>1,2</sup>, Haiying Li<sup>1</sup>, XueliHao<sup>1</sup>, Zhiying Zhang<sup>1</sup>, Yan Wang<sup>1</sup>, Jingyi Li<sup>\*1</sup>  
and Kai Wang<sup>2</sup>

<sup>1</sup> College of Chemistry and Chemical Engineering, Inner Mongolia University  
(Hohhot), Hohhot 010021, China;

yuxiujuan810@163.com (X.Y.); lihaiying0528gsj@163.com (H.L.);  
hxl18747721020@163.com (X.H.); zhangzhiying2019@163.com (Z.Z);  
wynmgnhy@163.com (Y.W.);

<sup>2</sup> Hebei Key Laboratory of Neuropharmacology, Hebei North University  
(Zhangjiakou), Zhangjiakou 075000, China; bfxxywangkai0313@163.com (K.W.)

\*Correspondence: lijingyicn@163.com (J.L.); Tel.: +86-13848129221 (J.L.).

## 1. GC determination conditions

Column type: sh-rtx-5 capillary column; carrier gas: high purity nitrogen; carrier gas flow rate: 30 mL/min; inlet temperature: 130 °C; detector temperature: 260 °C; oven temperature: 90 °C; injection volume: 0.8  $\mu$ L.

## 2. XPS Analysis of Pd/m-BiVO<sub>4</sub>

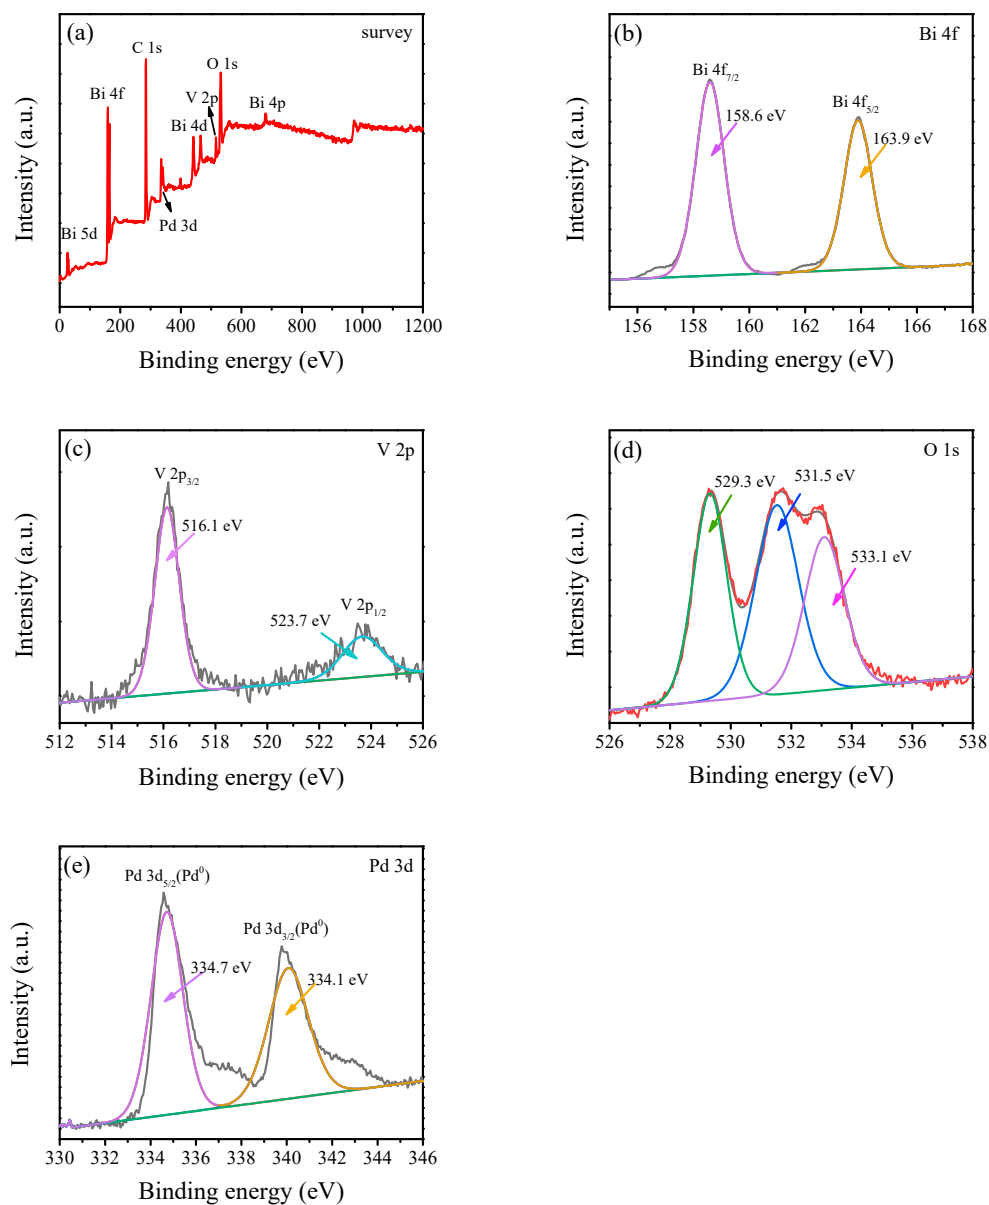

**Figure S1.** XPS spectra: (a) full spectrum of Pd/m-BiVO<sub>4</sub> (2 wt%), (b) Bi 4f, (c) V 2p, (d) O 1s, (e) Pd 3d.

### 3. Composition of Ag-Pd of the catalysts

#### 3.1 Test of the composition of Ag-Pd of the catalysts

The compositions of Ag-Pd were tested by Inductively coupled plasma optic emission spectrometer (ICP-OES, iCAP 6000, Thermo Scientific, USA ).

#### 3.2 Results of the composition of Ag-Pd of the catalysts

**Table S1.** The composition of Ag-Pd of the catalysts

| No. | Catalysts                              | Ag content (wt%) | Pd content (wt%) |
|-----|----------------------------------------|------------------|------------------|
| 1   | Ag/m-BiVO <sub>4</sub> (1 wt%)         | 1.25             | --               |
| 2   | Pd/m-BiVO <sub>4</sub> (1 wt%)         | --               | 1.53             |
| 3   | Ag/m-BiVO <sub>4</sub> (2 wt%)         | 2.69             | --               |
| 4   | Pd/m-BiVO <sub>4</sub> (2 wt%)         | --               | 2.76             |
| 5   | Ag/Pd/m-BiVO <sub>4</sub> (1 wt%, 2:1) | 0.91             | 0.54             |
| 6   | Ag/Pd/m-BiVO <sub>4</sub> (2 wt%, 2:1) | 1.69             | 0.80             |
| 7   | Ag/Pd/m-BiVO <sub>4</sub> (3 wt%, 2:1) | 2.37             | 1.24             |
| 8   | Ag/Pd/m-BiVO <sub>4</sub> (4 wt%, 2:1) | 2.44             | 1.32             |
| 9   | Ag/Pd/m-BiVO <sub>4</sub> (5 wt%, 2:1) | 3.19             | 1.51             |
